# Supplementary material
Source: publisher figshare collection journal article supplement (https://gsajournals.figshare.com/ndownloader/files/11109818)
Supplement: Supplementary file 1 [file 11109818]

Table S1 149 DHSs undergone significantly positive selection compared to neutral model

| start | end | Acceleration and conservation | | | special | TARGET GENE |
| --- | --- | --- | --- | --- | --- | --- |
| P | H | EXP |
| 30063120 | 30063775 |  | ACC |  | HF GAIN/MF GAIN | ABCF1 |
| 30072782 | 30073397 |  |  | CON | MF GAIN | TRIM31 |
| 30094800 | 30095910 |  | ACC |  | CF GAIN | HLA-G |
| 30097545 | 30100218 |  | ACC |  | COMMON/CF GAIN/MF GAIN | HLA-A/E/F |
| 30102968 | 30104164 |  | ACC |  | MF LOSS/HF GAIN/CF GAIN | HLA-P |
| 30104204 | 30105010 | CON |  | CON | CF GAIN | TRIM40 |
| 30114505 | 30115170 | CON |  | CON | CF GAIN/HF LOSS | HLA-A/E/F/H |
| 30119354 | 30120175 |  |  | CON | CF GAIN/HF LOSS | TRIM15 |
| 30120645 | 30120852 |  |  | CON | NO | NO |
| 30121629 | 30124429 | CON |  | CON | COMMON/HF GAIN/MF GAIN/CF LOSS/MF LOSS | HLA-W |
| 30124470 | 30124902 | CON |  | CON | MF GAIN/CF GAIN | HLA-F |
| 30125986 | 30126750 | CON |  | CON | MF GAIN/MF LOSS | HLA-A |
| 30127207 | 30127232 |  | ACC |  | CF GAIN | NO |
| 30128605 | 30128755 |  |  | CON | NO | NO |
| 30128980 | 30129442 |  | ACC |  | CF GAIN | TRIM10 |
| 30130760 | 30131570 | CON |  | CON | NO | TRIM15 |
| 30134905 | 30135421 | CON |  | CON | MF GAIN | HLA-A/E/F/N/H |
| 30136080 | 30136230 | CON |  | CON | NO | TRIM15 |
| 30137600 | 30138640 |  |  | CON | COMMON/MF LOSS | TRIM15 |
| 30139299 | 30140374 | CON |  | CON | MF GAIN/CF GAIN | NO |
| 30140442 | 30140975 |  | ACC |  | COMMON/HF LOSS | NO |
| 30153425 | 30154019 | CON |  | CON | CF GAIN | NO |
| 30154112 | 30154413 | CON |  | CON | CF GAIN | NO |
| 30568140 | 30569070 | CON | ACC | CON | CF GAIN/MF GAIN/HF LOSS | NRM/HCG22 |
| 30569245 | 30570690 | CON |  | CON | CF GAIN/MF GAIN | HLA-E/N |
| 30570800 | 30571579 | CON |  | CON | MF GAIN | NO |
| 30571599 | 30571858 | CON |  | CON | MF GAIN | NO |
| 30572600 | 30572750 | CON |  | CON | NO | NO |
| 30573680 | 30574016 | CON | ACC | CON | CF GAIN | HLA-E |
| 30594220 | 30595175 | CON |  | CON | COMMON | NO |
| 30595284 | 30595575 | CON |  | CON | NO | NO |
| 30595625 | 30595829 | CON |  | CON | CF GAIN | NO |
| 30877140 | 30877410 | CON |  | CON | NO | NO |
| 30879460 | 30879610 | CON |  | CON | NO | NO |
| 30881011 | 30884385 | CON |  | CON | COMMON/HF GAIN/CF GAIN/MF LOSS | NO |
| 30885335 | 30885805 | CON |  | CON | HF GAIN | NO |
| 30886200 | 30886873 | CON |  | CON | NO | NO |
| 30887557 | 30888456 | CON |  | CON | HF GAIN/CF GAIN | NO |
| 30888825 | 30889773 | CON |  | CON | NO | NO |
| 30890006 | 30890718 | CON |  | CON | NO | NO |
| 30892950 | 30894901 | CON |  | CON | HF LOSS | NO |
| 30899157 | 30901223 | CON |  | CON | COMMON/HF GAIN/MF GAIN/HF LOSS/CF LOSS/MF LOSS | SFTA2 |
| 31631600 | 31634790 | CON |  | CON | COMMON/CF LOSS/MF LOSS | HLA-B/C |
| 31635568 | 31635823 | CON |  | CON | NO | NO |
| 31637035 | 31637190 | CON |  | CON | MF GAIN | NO |
| 31637960 | 31638130 |  | ACC |  | NO | NO |
| 31910693 | 31911119 | CON |  | CON | CF GAIN | NO |
| 31911594 | 31911940 | CON |  | CON | MF GAIN | NO |
| 31912627 | 31914331 | CON |  | CON | COMMON | NO |
| 31914872 | 31915039 | CON |  | CON | MF GAIN | NO |
| 31915688 | 31915824 | CON |  | CON | NO | NO |
| 31916473 | 31917130 |  |  | CON | CF GAIN | CFB |
| 31918108 | 31918296 | CON |  | CON | CF GAIN | NO |
| 31919020 | 31919466 | CON |  | CON | CF GAIN | NO |
| 32781842 | 32785278 | CON |  | CON | COMMON/HF LOSS/MF LOSS/HF GAIN/MF GAIN/CF LOSS/ | DOB/DRA/DRB9/DRB5/DRB1/DQA1/DQB1/DQB3/DPA1/DPB2/DMA |
| 32786808 | 32786854 | CON |  | CON | NO | WDR46? |
| 32793685 | 32794282 | CON |  | CON | COMMON/MF LOSS | NO |
| 32798180 | 32798370 |  |  | CON | MF GAIN | DQB1 |
| 32799984 | 32800265 |  | ACC | CON | NO | NO |
| 32802940 | 32803210 | CON |  | CON | NO | NO |
| 32803365 | 32803595 | CON |  | CON | NO | NO |
| 32805262 | 32806948 | CON |  | CON | COMMON | DOB |
| 32808165 | 32808315 |  | ACC |  | NO | NO |
| 32808378 | 32808930 |  | ACC |  | NO | HLA-DPB1/HLA-DQA1/HLA-DQB1/HLA-DQB2/HLA-DMB/BRD2/HCG25/B3GALT4/DAXX/TAP2/PSMB8/PSMB9/TAP1/RPS18/VPS52/WDR46/PFDN6/RGL2/TAPBP/ZBTB22 |
| 32810413 | 32810870 | CON |  | CON | CF GAIN | DRB9/DRB5/DQA1/DQB1/DMA/DOA/DPA1 |
| 32813140 | 32813635 | CON |  | CON | MF GAIN | DQA1/DQB1/DQB2/DPA1/DPB1/DMB |
| 32814860 | 32815030 | CON |  | CON | NO | NO |
| 32815720 | 32815915 | CON |  | CON | NO | regulate 20 genes(50% overlap) |
| 32820065 | 32823157 | CON |  | CON | COMMON(10 GENE) | DRB1-DRA-DMB-DMA-DPB1-DPA1-DPB2-DQA1-DQB1-DQB2 |
| 32823920 | 32824070 |  |  | CON | NO | NO |
| 32825853 | 32826254 | CON |  | CON | MF GAIN | NO |
| 32836794 | 32836936 | ACC |  |  | NO | NO |
| 33116838 | 33117612 |  | ACC |  | COMMON/CF GAIN/HF LOSS/MF LOSS | NO |
| 33117838 | 33118062 |  | ACC |  | CF GAIN | NO |
| 33131034 | 33135015 | CON |  | CON | COMMON/HF GAIN/CF GAIN/MF GAIN/HF LOSS/CF LOSS/MF LOSS | NO |
| 33136807 | 33149250 | CON |  | CON | COMMON/HF GAIN/CF GAIN/MF GAIN/HF LOSS/CF LOSS/MF LOSS | DAXX-RGL2-COL11A2 |
| 33150555 | 33152747 | CON |  | CON | COMMON/HF GAIN/CF GAIN/CF LOSS/MF LOSS | DMA/DMB/DPA1/DPB1/DPB2/DQA2/DQB2-DQB3 |
| 33153008 | 33153792 | CON |  | CON | CF GAIN/MF GAIN | DOA |
| 33154258 | 33154467 | CON |  | CON | NO | NO |
| 33159200 | 33162005 | CON |  | CON | HF GAIN/CF GAIN/MF GAIN/HF LOSS/COMMON/ | DQB3-DOA/DPA1-DPA3 |
| 33162050 | 33162396 | CON |  | CON | MF GAIN | NO |
| 33162465 | 33163093 | CON |  | CON | HF LOSS | RXRB |
| 33163108 | 33163411 | CON |  | CON | NO | RXRB |
| 33163690 | 33164014 | CON |  | CON | CF GAIN | NO |
| 33164124 | 33164528 | CON |  | CON | NO | NO |
| 33165164 | 33165950 | CON |  | CON | COMMON/HF LOSS/MF LOSS | DMA/DMB/DPB1/DPB2/DQA2 |
| 33165966 | 33166317 | CON |  | CON | MF GAIN | DOA |
| 33167218 | 33169725 | CON |  | CON | COMMON/CF GAIN | VPS52-WDR46/PFDN6/WDR46/RGL2RGL2/B3GALT4/TAP2 |
| 33392434 | 33392489 |  |  |  | NO |  |
| 33397910 | 33401087 | CON |  | CON | CF GAIN/COMMON/HF GAIN/MF GAIN/HF LOSS/MF LOSS | DMB-DMA-DPB1 |
| 33401133 | 33402249 | CON |  | CON | CF LOSS | NO |
| 33405311 | 33406234 | CON |  | CON | HF GAIN | NO |
| 33406280 | 33406563 | CON |  | CON | NO | NO |
| 33637359 | 33641929 | CON |  | CON | HF LOSS | COL11A2-DAXX |
| 33641948 | 33642691 |  | ACC |  | MF GAIN | NO |
| 33643934 | 33643955 | CON |  | CON | CF GAIN | NO |
| 33644145 | 33645846 | CON |  | CON | COMMON/MF LOSS | NO |
| 33645848 | 33648027 | CON |  | CON | MF GAIN | NO |
| 33650061 | 33653417 | CON |  | CON | MF GAIN | NO |
| 33653510 | 33656819 | CON |  | CON | COMMON/HF GAIN/CF GAIN/MF GAIN/ | NO |
| 33657232 | 33663881 | CON |  | CON | COMMON/HF GAIN/MF GAIN/HF LOSS/CF LOSS/MF LOSS | DAXX-RXRB-RING1-RPS18/VPS52/WDR46/PFDN6/RGL2/TAPBP/ZBTB22/HCG25/B3GALT4- |
| 33664209 | 33665085 | CON | ACC | CON | HF LOSS | TAPBP/VPS52 |
| 33665575 | 33665826 |  | ACC |  | NO | NO |
| 33667475 | 33669227 | CON |  | CON | COMMON/CF GAIN/HF LOSS | TAPBP-HCG25/DAXX/RPS18/VPS52/PFDN6/WDR46/RGL2-B3GALT4/daxx/rps18 |
| 33673142 | 33673626 | CON |  | CON | HF LOSS/MF LOSS | NO |
| 33675063 | 33675210 |  |  | CON | CF GAIN | NO |
| 33675891 | 33676010 | CON |  | CON | NO | NO |
| 33684726 | 33685000 | CON |  | CON | CF GAIN | NO |
| 33685725 | 33686947 | CON |  | CON | CF GAIN/CF LOSS/MF LOSS | NO |
| 33687131 | 33687700 | CON |  | CON | CF GAIN/MF GAIN/CF LOSS | NO |
| 33688767 | 33689416 | CON |  | CON | MF GAIN | NO |
| 33690317 | 33690526 | CON |  | CON | HF GAIN | NO |
| 33690681 | 33690921 | CON |  | CON | NO | NO |
| 33691095 | 33691237 | CON |  | CON | HF GAIN | NO |
| 33691604 | 33691777 |  | ACC | CON | NO | NO |
| 33692062 | 33692628 | CON | ACC | CON | HF GAIN/CF LOSS | NO |
| 33693394 | 33693657 | CON |  | CON | HF GAIN | NO |
| 33693670 | 33695328 | CON | ACC | CON | COMMON/CF GAIN/HF LOSS/CF LOSS | NO |
| 33703149 | 33703238 | CON |  | CON | MF GAIN | NO |
| 33703402 | 33703491 | CON |  | CON | NO | NO |
| 33707592 | 33708590 | CON |  | CON | HF LOSS | NO |
| 33710484 | 33711160 | CON | ACC | CON | HF GAIN/MF GAIN | NO |
| 33711211 | 33713074 | CON |  | CON | HF GAIN/MF GAIN/HF LOSS/CF LOSS/MF LOSS | NO |
| 33728482 | 33728820 | CON |  | CON | NO |  |
| 33735444 | 33735993 | CON |  | CON | CF GAIN/MF GAIN | NO |
| 33737044 | 33740474 | CON |  | CON | COMMON/HUMAN GAIN/CF GAIN/MF GAIN/HF LOSS | NO |
| 33740669 | 33740806 | CON |  | CON | MF GAIN | NO |
| 33740933 | 33741091 | CON |  | CON | HF GAIN | NO |
| 33744932 | 33745400 | CON |  | CON | HF GAIN/CF GAIN | NO |
| 33745570 | 33746148 | CON |  | CON | HF GAIN/MF GAIN | NO |
| 33746445 | 33746763 | CON |  | CON | MF GAIN | NO |
| 33747114 | 33747180 | CON |  | CON | NO | NO |
| 33747201 | 33747909 | CON |  | CON | MF GAIN | NO |
| 33748728 | 33750169 | CON |  | CON | COMMON/HF GAIN/MF LOSS | NO |
| 33753484 | 33753966 | CON |  | CON | MF LOSS | NO |
| 33754356 | 33754671 | CON |  | CON | CF GAIN | NO |
| 33754843 | 33757498 | CON |  | CON | COMMON/MF LOSS | NO |
| 33758053 | 33758674 | CON |  | CON | COMMON/HF LOSS/MF LOSS | NO |
| 33758851 | 33759041 |  | ACC |  | MF GAIN | NO |
| 33759203 | 33759491 | CON |  | CON | CF GAIN | NO |
| 33760926 | 33761554 |  | ACC |  | HF GAIN/MF GAIN/HF LOSS | NO |
| 33767452 | 33770879 | CON |  | CON | CF GAIN/MF GAIN/CF LOSS/MF LOSS | NO |
| 33775347 | 33775943 | CON |  | CON | MF GAIN | NO |
| 33776007 | 33776110 |  |  | CON | MF GAIN | NO |
| 33777180 | 33777301 |  |  | CON | MF GAIN | NO |
| 33779298 | 33779479 | CON |  | CON | MF GAIN | NO |
| 33779594 | 33779704 | CON |  | CON | NO | NO |
| 33779760 | 33780991 | CON |  | CON | NO | NO |
| 33784310 | 33787044 | CON |  | CON | COMMON/HF GAIN/CF GAIN/MF GAIN/HF LOSS/CF LOSS/MF LOSS | NO |

P meant primate, EXP meant primate except human. CON meant conserved. ACC meant acceleration.

Using test for positive selection there were 149 DHSs undergone significantly positive selection. Of these DHSs, compared to the neutral sequence, 1 was accelerated across all 6 primates, 118 were conserved across all 6 primates and 131were conserved across all 5 primates except human, including chimpanzee, gorilla, orangutan, macaque, and marmoset and 24 were evolved rapidly on the human lineage.
